# Supplementary material for: Systematic review and meta-analysis of tick-borne disease risk factors in residential yards, neighborhoods, and beyond
Source: PubMed Central journal article supplement (PMC6798452; doi:10.1186/s12879-019-4484-3), 2019-10-17
Supplement: 12879_2019_4484_MOESM2_ESM.pdf [file 12879_2019_4484_MOESM2_ESM.pdf]

Appendix Table A1. Possible risk factors found in initial set of six articles. "Variable" indicates risk factor as described in the article. We used these terms as keywords in a Web of Science search.

| Variable                                                                     | Source               | keyword for Web of Science search      |
|------------------------------------------------------------------------------|----------------------|----------------------------------------|
| Groundhogs in yard                                                           | Klein et al. 1996    | yard* groundhog*                       |
| black-legged ticks on property                                               | Klein et al. 1996    | propert*                               |
| leaf litter                                                                  | Klein et al. 1996    | leaf litter                            |
| Ground cover including moist humus                                           | Klein et al. 1996    | ground cover*                          |
| deer on property                                                             | Orloski et al. 1993  | propert*                               |
| Deer damage landscape                                                        | Orloski et al. 1993  | landscap*                              |
| woods                                                                        | Connally et al. 2009 | wood* OR propert* OR yard*             |
| rock wall / stone wall                                                       | Smith et al. 2001    | rock wall* OR stone wall*              |
| Shrub percentage of land                                                     | Finch et al. 2014    | shrub* OR land*                        |
| a yard or land attached to home                                              | Smith et al. 2001    | home* OR yard*                         |
| Deer damage to trees                                                         | Smith et al. 2001    | tree* deer                             |
| Deer damage to shrubs                                                        | Smith et al. 2001    | shrub* deer                            |
| Single family home                                                           | Smith et al. 2001    | family OR home*                        |
| Rural residence                                                              | Orloski et al. 1993  | rural* OR residen*                     |
| Suburban residence                                                           | Smith et al. 2001    | suburb* OR residen*                    |
| Had woods adjacent to property                                               | Connally et al. 2009 | wood*                                  |
| density of infected nymphs                                                   | Connally et al. 2006 | density infected nymphs                |
| age of home                                                                  | Smith et al. 2001    | home*                                  |
| Age of nearby housing                                                        | Smith et al. 2001    | hous*                                  |
| Proximity to woods                                                           | Smith et al. 2001    | wood*                                  |
| mice observed                                                                | Smith et al. 2001    | mice* observ*                          |
| bird feeder                                                                  | Orloski et al. 1993  | bird* feed*                            |
| presence of log pile / woodpile                                              | Orloski et al. 1993  | log* pile* OR woodpile*                |
| presence of garden                                                           | Orloski et al. 1993  | garden*                                |
| Landscape-related tick control measures                                      | Finch et al. 2014    | tick* control* OR landscap*            |
| Clearing brush                                                               | Orloski et al. 1993  | brush* OR clear*                       |
| Area-wide acaricide use                                                      | Finch et al. 2014    | acaricide* use*                        |
| Wore light-colored clothing while in the yard                                | Smith et al. 2001    | cloth*                                 |
| Wore long pants while in the yard                                            | Smith et al. 2001    | long pant*                             |
| mulch or gravel dry barrier where lawn met woods                             | Connally et al. 2009 | barrier* OR mulch* OR gravel* OR lawn* |
| Used pesticides for pests other than ticks                                   | Connally et al. 2009 | pesticide* use*                        |
| Trimmed branches back where lawn met woods                                   | Connally et al. 2009 | branch* OR trim*                       |
| Cleared leaf litter from where lawn met woods                                | Connally et al. 2009 | leaf litter                            |
| Used rodent-targeted tick-control devices                                    | Connally et al. 2009 | tick* control*                         |
| Performed tick checks within 36 hours after spending time in the yard        | Connally et al. 2009 | tick* check*                           |
| Bathed within 2 hours after spending time in the yard                        | Connally et al. 2009 | bath*                                  |
| Wore repellent while in the yard                                             | Connally et al. 2009 | repellen* wore                         |
| Had deer-exclusion fencing around property                                   | Connally et al. 2009 | fenc*                                  |
| Mowed lawn 3 or more times in the month prior to erythema migrans rash onset | Connally et al. 2009 | mow* OR lawn*                          |
| Had a fence on the property (any type)                                       | Connally et al. 2009 | fenc*                                  |
| Years in home                                                                | Smith et al. 2001    | year* home*                            |
| Leave feed for mammals                                                       | Smith et al. 2001    | feed* mammal*                          |
| Indices of gardening activity: use one or more electrical tools              | Smith et al. 2001    | garden*                                |
| Indices of gardening activity: use one or more gasoline tools                | Smith et al. 2001    | garden*                                |
| Unpowered tools                                                              | Smith et al. 2001    | unpowered tool*                        |
| Hour per week yard work                                                      | Smith et al. 2001    | work* OR yard*                         |
| before working or playing in yard: apply insect repellents                   | Smith et al. 2001    | play*                                  |
| before working or playing in yard: wear long pants                           | Smith et al. 2001    | long pant*                             |
| before working or playing in yard: wear light-colored clothing               | Smith et al. 2001    | light* cloth*                          |
| before working or playing in yard: use acaricides                            | Smith et al. 2001    | acaricide* use*                        |
| Occupational exposure to tick habitat                                        | Finch et al. 2014    | occupat* OR expos*                     |
| Have outdoor job                                                             | Smith et al. 2001    | outdoor* OR job*                       |
| Have a job that takes you into the woods                                     | Smith et al. 2001    | job* OR wood*                          |

Appendix Table A1. Possible risk factors found in initial set of six articles. "Variable" indicates risk factor as described in the article. We used these terms as keywords in a Web of Science search.

| Variable                                                                       | Source               | keyword for Web of Science search    |
|--------------------------------------------------------------------------------|----------------------|--------------------------------------|
| Have a job that takes you into woody margins                                   | Smith et al. 2001    | wood* OR margin*                     |
| Visit parks                                                                    | Smith et al. 2001    | park* OR visit*                      |
| Camp in an RV                                                                  | Smith et al. 2001    | camp*                                |
| Picnic in designated areas in parks                                            | Smith et al. 2001    | picnic*                              |
| before work or recreation outdoors away from home: apply insect repellents     | Smith et al. 2001    | recreat*                             |
| before work or recreation outdoors away from home: wear long pants             | Smith et al. 2001    | long pant*                           |
| before work or recreation outdoors away from home: wear light colored clothing | Smith et al. 2001    | light* cloth*                        |
| before work or recreation outdoors away from home: tuck pants legs into socks  | Smith et al. 2001    | sock* OR pant*                       |
| before work or recreation outdoors away from home: use acaricides              | Smith et al. 2001    | acaricide* use*                      |
| Work in wooded areas, hours per week                                           | Smith et al. 2001    | work* wood*                          |
| average age of people with cases                                               | Finch et al. 2014    | age*                                 |
| Female or Male                                                                 | Orloski et al. 1993  | female* OR male* OR gender*          |
| hours spent in vegetation                                                      | Finch et al. 2014    | hour* vegetat*                       |
| owning a dog                                                                   | Finch et al. 2014    | dog* own*                            |
| owning a cat                                                                   | Finch et al. 2014    | cat* own*                            |
| owning a horse                                                                 | Finch et al. 2014    | horse*                               |
| owning a different pet                                                         | Finch et al. 2014    | pet* own*                            |
| previous Lyme diagnosis                                                        | Finch et al. 2014    | Lyme diagnos* previous*              |
| Use of any protective measure                                                  | Finch et al. 2014    | protect* measure*                    |
| use of repellent                                                               | Finch et al. 2014    | repellen* use*                       |
| use of protective clothing                                                     | Finch et al. 2014    | protect* OR cloth*                   |
| wear long pants                                                                | Connally et al. 2009 | long pant*                           |
| wear light-colored clothing                                                    | Connally et al. 2009 | light cloth*                         |
| Tuck pants into socks                                                          | Connally et al. 2009 | pant* OR socks                       |
| Avoiding brush                                                                 | Finch et al. 2014    | avoid* OR brush*                     |
| Tick checking                                                                  | Orloski et al. 1993  | tick* check*                         |
| Tick bite within the past year                                                 | Finch et al. 2014    | tick* bite*                          |
| Tick bite within the past year in study area                                   | Finch et al. 2014    | tick* bite*                          |
| Received prophylactic antibiotic therapy after tick bite                       | Connally et al. 2009 | tick* bite*                          |
| camping                                                                        | Klein et al. 1996    | camp*                                |
| Does using woods in or near the yard for recreation or play increase the risk? | Smith et al. 2001    | wood*                                |
| Being a parent                                                                 | Smith et al. 2001    | parent*                              |
| Have children who participate in outdoor sports                                | Smith et al. 2001    | outdoor*                             |
| Engage in any outdoor recreation                                               | Smith et al. 2001    | outdoor* OR recreat*                 |
| Fish                                                                           | Klein et al. 1996    | fish*                                |
| Hunt                                                                           | Smith et al. 2001    | hunt*                                |
| Ride Horses                                                                    | Smith et al. 2001    | horse*                               |
| Camp in a tent                                                                 | Smith et al. 2001    | tent*                                |
| Walk or jog outdoors                                                           | Smith et al. 2001    | jog* OR walk*                        |
| Walk or jog in woods or wooded areas                                           | Orloski et al. 1993  | walk* OR wood* OR jog* OR wood*      |
| walk or jog in grassy areas                                                    | Orloski et al. 1993  | walk* OR grass* OR jog* OR grass*    |
| play on mowed fields                                                           | Orloski et al. 1993  | play* OR field* OR play* OR mow*     |
| Picnic outside parks or in non-designated areas in parks                       | Smith et al. 2001    | picnic*                              |
| check for ticks during outdoor activities                                      | Smith et al. 2001    | tick* check* OR outdoor* OR activit* |
| check for ticks after outdoor activities                                       | Smith et al. 2001    | tick* check* OR outdoor* OR activit* |
| finding ticks during a search                                                  | Smith et al. 2001    | outdoor*                             |
| trimmed branches back where lawn met woods                                     | Connally et al. 2009 | trim* OR branch*                     |
| cleared leaf litter where lawn met woods                                       | Connally et al. 2009 | clear* OR leaf litter                |
| time outdoors in warm weather                                                  | Klein et al. 1996    | outdoor*                             |
| vacationing in Lyme-endemic regions                                            | Klein et al. 1996    | vacation*                            |

Appendix Table A1. Possible risk factors found in initial set of six articles. "Variable" indicates risk factor as described in the article. We used these terms as keywords in a Web of Science search.

| Variable                                                                          | Source               | keyword for Web of Science search                     |
|-----------------------------------------------------------------------------------|----------------------|-------------------------------------------------------|
| school attendance                                                                 | Klein et al. 1996    | school*                                               |
| daycare attendance                                                                | Klein et al. 1996    | daycare*                                              |
| hiking or playing in woods                                                        | Klein et al. 1996    | hik* OR play*                                         |
| rolling down hills                                                                | Klein et al. 1996    | roll* OR hill*                                        |
| climbing trees                                                                    | Klein et al. 1996    | climb* OR tree*                                       |
| playing in yard                                                                   | Klein et al. 1996    | play*                                                 |
| running or jogging cross-country                                                  | Klein et al. 1996    | run* OR jog*                                          |
| public playground use                                                             | Klein et al. 1996    | public* OR play*                                      |
| participation in outdoor sports                                                   | Klein et al. 1996    | sport* OR outdoor*                                    |
| golf                                                                              | Klein et al. 1996    | golf*                                                 |
| summer camp attendance                                                            | Klein et al. 1996    | camp*                                                 |
| lawn mowing                                                                       | Klein et al. 1996    | lawn* OR mow*                                         |
| wood cutting                                                                      | Klein et al. 1996    | cut* OR wood*                                         |
| leaf raking                                                                       | Klein et al. 1996    | rak*                                                  |
| gardening                                                                         | Klein et al. 1996    | garden*                                               |
| burning vegetation                                                                | Klein et al. 1996    | vegetat* OR burn*                                     |
| parent with outdoor occupation                                                    | Klein et al. 1996    | parent*                                               |
| presence on property of animals (including raccoons, opossums, birds, mice, deer) | Klein et al. 1996    | raccoon* presen* OR opossum* presen* OR bird* presen* |
| owning pets                                                                       | Klein et al. 1996    | pet* own*                                             |
| identification of deer ticks on pets                                              | Klein et al. 1996    | tick* pet*                                            |
| identification of deer ticks on children                                          | Klein et al. 1996    | tick* child* OR child*                                |
| other insect bites                                                                | Klein et al. 1996    | insect* bite*                                         |
| use of insect repellents on children                                              | Klein et al. 1996    | repellen* use*                                        |
| use of insecticides on property                                                   | Klein et al. 1996    | insecticid* use*                                      |
| use of protective dress (long pants, shoes, and socks in warm weather)            | Klein et al. 1996    | protect* use*                                         |
| regular tick checks                                                               | Klein et al. 1996    | tick* check*                                          |
| frequency of bathing (including by parent)                                        | Klein et al. 1996    | bath*                                                 |
| description of child as extrovert, outdoor type, nature lover, or animal lover    | Klein et al. 1996    | natur*                                                |
| recreational areas (e.g. playscapes)                                              | Connally et al. 2009 | recreat*                                              |
| wear clothing treated with permethrin insecticide                                 | Connally et al. 2009 | permethrin                                            |
| history of travel to tick-endemic areas                                           | Connally et al. 2009 | travel*                                               |
| deer ticks on property                                                            | Klein et al. 1996    | propert* tick*                                        |
| own livestock                                                                     | Connally et al. 2009 | livestock* own*                                       |
| entomologic risk index                                                            | Connally et al. 2006 | entomologic* risk*                                    |
