# Supplementary material for: Systematic review and meta-analysis of tick-borne disease risk factors in residential yards, neighborhoods, and beyond
Source: Springer Nature journal article supplement (doi:10.1186/s12879-019-4484-3), 2019-10-17
Supplement: MOESM6 [file 17284310]

Appendix Table A4. Overview of studies included in the meta-analysis of spatial risk factors for tick-borne diseases and tick bites.

| Citation                         | Cases | Controls | Age           | Study dates   | Outcome measure | Study type           | Location               |
|----------------------------------|-------|----------|---------------|---------------|-----------------|----------------------|------------------------|
| Aenishaenslin et al. 2017 [1]    | 42    | 2834     | All           | 2014          | disease         | survey               | Canada                 |
| Connally et al. 2009 [2]         | 364   | 349      | All           | 2005-2007     | disease         | case control         | CT                     |
| Mead et al. 2018[3]              | 91    | 840      | All           | 2013          | bite            | case control         | CT                     |
| Vazquez et al. 2008 [4]          | 285   | 557      | All           | 2003          | disease         | case control         | CT                     |
| Hinckley et al. 2015 bite [5]    | 1303  | 2502     | All           | 2011-2012     | bite            | controlled trial     | CT, MD, NY             |
| Hinckley et al. 2015 disease [5] | 1273  | 2461     | All           | 2011-2012     | disease         | controlled trial     | CT, MD, NY             |
| Klein et al. 1996 [6]            | 42    | 42       | Children      | not specified | disease         | case control         | DE, MD, PA, NJ         |
| Richards et al. 2015 [7]         | 22    | 13       | Adults        | 2013          | bite            | controlled trial     | KY, NC, OH, TN, VA, WV |
| Glass et al. 1995 [8]            | 47    | 492      | not specified | 1989-1990     | disease         | case control         | MD                     |
| Bowen et al. 1984 [9]            | 20    | 1112     | Adults        | 1981-1982     | disease         | case control         | NJ                     |
| Schwartz & Goldstein 1990 [10]   | 39    | 633      | Adults        | 1988          | disease         | case control         | NJ                     |
| Schwartz et al. 1991 [11]        | 22    | 213      | Adults        | 1989          | bite            | case control         | NJ                     |
| Orloski et al. 1998 [12]         | 51    | 51       | All           | 1993          | disease         | case control         | NJ                     |
| Wallace et al. 1998 [13]         | 19    | 53       | Adults        | 1995          | disease         | case control         | NY                     |
| Townsend et al. 2003 [14]        | 88    | 492      | All           | 2001-2002     | disease         | case control         | NY                     |
| Smith et al. 1988 [15]           | 27    | 362      | Adults        | 1986          | disease         | longitudinal         | NY                     |
| Vaughn & Mesnick 2011 [16]       | 9     | 7        | Adults        | 2008          | bite            | non-controlled trial | NC                     |
| Smith et al. 2001 [17]           | 294   | 449      | All           | 1998          | disease         | case control         | PA                     |
| Connally et al. 2006 [18]        | 47    | 47       | All           | 2002-2003     | disease         | case control         | RI                     |
| Finch et al. 2014 [19]           | 86    | 809      | not specified | 2005-2011     | disease         | longitudinal         | RI                     |
| Belongia et al. 2001 [20]        | 17    | 45       | All           | 1997-1998     | disease         | case control         | WI                     |

## References

1. Aenishaenslin, C., et al., *Exposure and preventive behaviours toward ticks and Lyme disease in Canada: Results from a first national survey*. Ticks Tick Borne Diseases, 2017. **8**(1): p. 112-118.
2. Connally, N.P., et al., *Peridomestic Lyme disease prevention: results of a population-based case-control study*. Am J Prev Med, 2009. **37**(3): p. 201-6.
3. Mead, P., et al., *Risk factors for tick exposure in suburban settings in the Northeastern United States*. Ticks and Tick-Borne Diseases, 2018. **9**(2): p. 319-324.
4. Vazquez, M., et al., *Effectiveness of Personal Protective Measures to Prevent Lyme Disease*. Emerging Infectious Diseases, 2008. **14**(2): p. 210-216.
5. Hinckley, A.F., et al., *Effectiveness of Residential Acaricides to Prevent Lyme and Other Tick-borne Diseases in Humans*. J Infect Dis, 2016. **214**(2): p. 182-8.
6. Klein, J.D., S.C. Eppes, and P. Hunt, *Environmental and Life-style Risk Factors for Lyme Disease in Children*. Clinical Pediatrics, 1996. **35**(7): p. 359-363.
7. Richards, S.L., J.A.G. Balanay, and J.W. Harris, *Effectiveness of permethrin-treated clothing to prevent tick exposure in foresters in the central Appalachian region of the USA*. International Journal of Environmental Health Research, 2015. **25**(4): p. 453-462.
8. Glass, G.E., et al., *Environmental Risk Factors for Lyme Disease Identified with Geographic Information Systems*. American Journal of Public Health, 1994.
9. Bowen, G.S., et al., *A Focus of Lyme diseases in Monmouth County, New Jersey*. American Journal of Epidemiology, 1984. **120**(3): p. 387-394.
10. Schwartz, B.S. and M.D. Goldstein, *Lyme disease in outdoor workers: risk factors, preventive measures, and tick removal methods*. American Journal of Epidemiology, 1990. **131**(5): p. 877-885.
11. Schwartz, B.S., et al., *Antitick saliva antibody - a biologic marker of tick exposure that is a risk factor for Lyme disease seropositivity*. American Journal of Epidemiology, 1991. **134**(1): p. 86-95.
12. Orloski, K.A., et al., *Emergence of Lyme disease in Hunterdon County, New Jersey, 1993: a case-control study of risk factors and evaluation of reporting patterns*. American journal of epidemiology, 1998. **147**(4): p. 391-7.
13. Wallace, B.J., et al., *Human granulocytic ehrlichiosis in New York*. Archives of Internal Medicine, 1998. **158**(7): p. 769-773.
14. Townsend, A.K., R.S. Ostfeld, and K.H. Geher, *The effects of bird feeders on Lyme disease prevalence and density of Ixodes scapularis (Acari: Ixodidae) in a residential area of Dutchess County, New York*. Journal of Medical Entomology, 2003. **40**(4): p. 540-546.
15. Smith, P.F., et al., *Occupational risk of Lyme-disease in endemic areas of New York state*. Annals of the New York Academy of Sciences, 1988. **539**: p. 289-301.
16. Vaughn, M.F. and S.R. Meshnick, *Pilot Study Assessing the Effectiveness of Long-Lasting Permethrin-Impregnated Clothing for the Prevention of Tick Bites*. Vector-Borne and Zoonotic Diseases, 2011. **11**(7): p. 869-875.
17. Smith, G., et al., *Risk factors for Lyme disease in Chester County, Pennsylvania*. Public Health Reports, 2001. **116**(SUPPL. 1): p. 146-156.

18. Connally, N.P., H.S. Ginsberg, and T.N. Mather, *Assessing peridomestic entomological factors as predictors for Lyme disease*. Journal of Vector Ecology, 2006. **31**(2): p. 364-370.
19. Finch, C., et al., *Integrated assessment of behavioral and environmental risk factors for Lyme disease infection on Block Island, Rhode Island*. PLoS One, 2014. **9**(1): p. e84758.
20. Belongia, E.A., et al., *Tickborne Infections as a Cause of Nonspecific Febrile Illness in Wisconsin*. Clinical Infectious Diseases, 2001. **54449**.
