# Supplementary material for: Systematic review and meta-analysis of tick-borne disease risk factors in residential yards, neighborhoods, and beyond
Source: Springer Nature journal article supplement (doi:10.1186/s12879-019-4484-3), 2019-10-17
Supplement: MOESM7 [file 17284310]

Appendix Table A.5. Counts of measures at each spatial scale, relative to quartiles of Lyme disease incidence. Each count is the number of observations of disease risk factors at the specified spatial scale, and for studies in areas with Lyme disease incidence less than the quartile upper bound and greater than or equal to the upper bound of the previous quartile. Quartiles were computed based on the distribution of Lyme disease incidence in U.S. states (averaged over the years 2006-2016) and Canada (2009-2016).

| Lyme disease incidence quartile | Yard count | Neighborhood count | Outside neighborhood count | Quartile: upper bound of Lyme disease incidence |
|---------------------------------|------------|--------------------|----------------------------|-------------------------------------------------|
| 1                               | 1          | 1                  | 2                          | 17.827                                          |
| 2                               | 6          | 1                  | 10                         | 29.227                                          |
| 3                               | 1          | 0                  | 0                          | 36.582                                          |
| 4                               | 51         | 3                  | 22                         | 58.636                                          |
