# Supplementary material for: Systematic review and meta-analysis of tick-borne disease risk factors in residential yards, neighborhoods, and beyond
Source: BMC Infect Dis. 2019 Oct 17;19:861. doi: 10.1186/s12879-019-4484-3 (PMC6798452; doi:10.1186/s12879-019-4484-3)
Supplement: Supplementary file 8 — Additional file 8: Table S6. Estimated odds ratio, standard error, 95% confidence interval, and P-values for effects of spatial scale and publication year on tick-borne disease risk, assuming neighborhood extends 750 m from property boundaries (Table S6.1) or 250 m from property boundaries (Table S6.2). [file 12879_2019_4484_MOESM8_ESM.pdf]

Table A.6.1. Estimated odds ratio, standard error, 95% confidence interval, and P-values for effects of spatial scale and publication year on tick-borne disease risk, assuming neighborhood extends 750 m from property boundaries.

| <b>spatial scale</b>        | <b>odds ratio</b> | <b>SE</b> | <b>CI</b>    | <b>P</b> | <b>number of studies</b> | <b>number of records</b> |
|-----------------------------|-------------------|-----------|--------------|----------|--------------------------|--------------------------|
| <b>Yard</b>                 | 2.62              | 1.16      | [1.97, 3.48] | <0.0001  | 13                       | 59                       |
| <b>neighborhood</b>         | 4.1               | 1.29      | [2.5, 6.72]  | <0.0001  | 4                        | 5                        |
| <b>outside neighborhood</b> | 2.05              | 1.13      | [1.61, 2.62] | <0.0001  | 8                        | 33                       |
| <b>Year</b>                 | 0.97              | 1.01      | [0.96, 0.99] | <0.0001  | NA                       | NA                       |

Table A.6.2. Estimated odds ratio, standard error, 95% confidence interval, and P-values for effects of spatial scale and publication year on tick-borne disease risk, assuming neighborhood extends 250 m from property boundaries.

| <b>spatial scale</b>        | <b>odds ratio</b> | <b>SE</b> | <b>CI</b>    | <b>P</b> | <b>number of studies</b> | <b>number of records</b> |
|-----------------------------|-------------------|-----------|--------------|----------|--------------------------|--------------------------|
| <b>yard</b>                 | 2.61              | 1.16      | [1.96, 3.47] | <0.0001  | 13                       | 59                       |
| <b>neighborhood</b>         | 4.08              | 1.29      | [2.49, 6.69] | <0.0001  | 4                        | 5                        |
| <b>outside neighborhood</b> | 2.04              | 1.13      | [1.6, 2.6]   | <0.0001  | 9                        | 34                       |
| <b>year</b>                 | 0.97              | 1.01      | [0.96, 0.99] | <0.0001  | NA                       | NA                       |
